# Supplementary material
Source: Springer Nature journal article supplement (https://www.springermedizin.de/resource/supplementary/12958_2012_1000_MOESM6_ESM.pdf/9566606)

**A*****Gli1***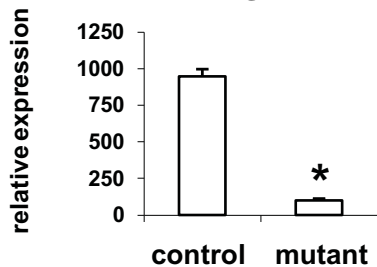**B*****Ptch1***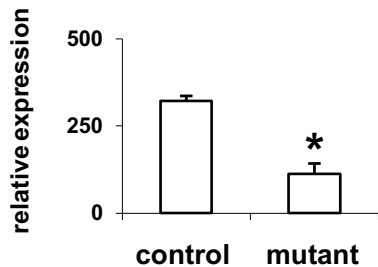**C*****lhh***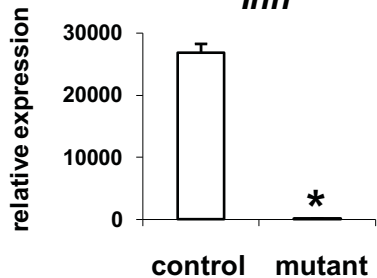**D*****Muc1***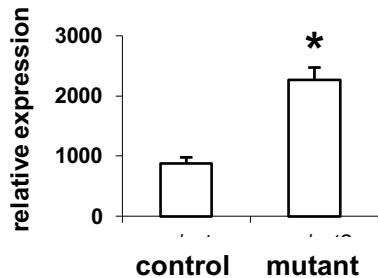

Supplement: MOESM6 [file 9566606]
